# Supplementary figures and images for: Systematic review assessing the effects of amendments on acidic soils pH in tea plantations
Source: PeerJ journal article supplement (doi:10.7717/peerj.17653), 2024-07-24

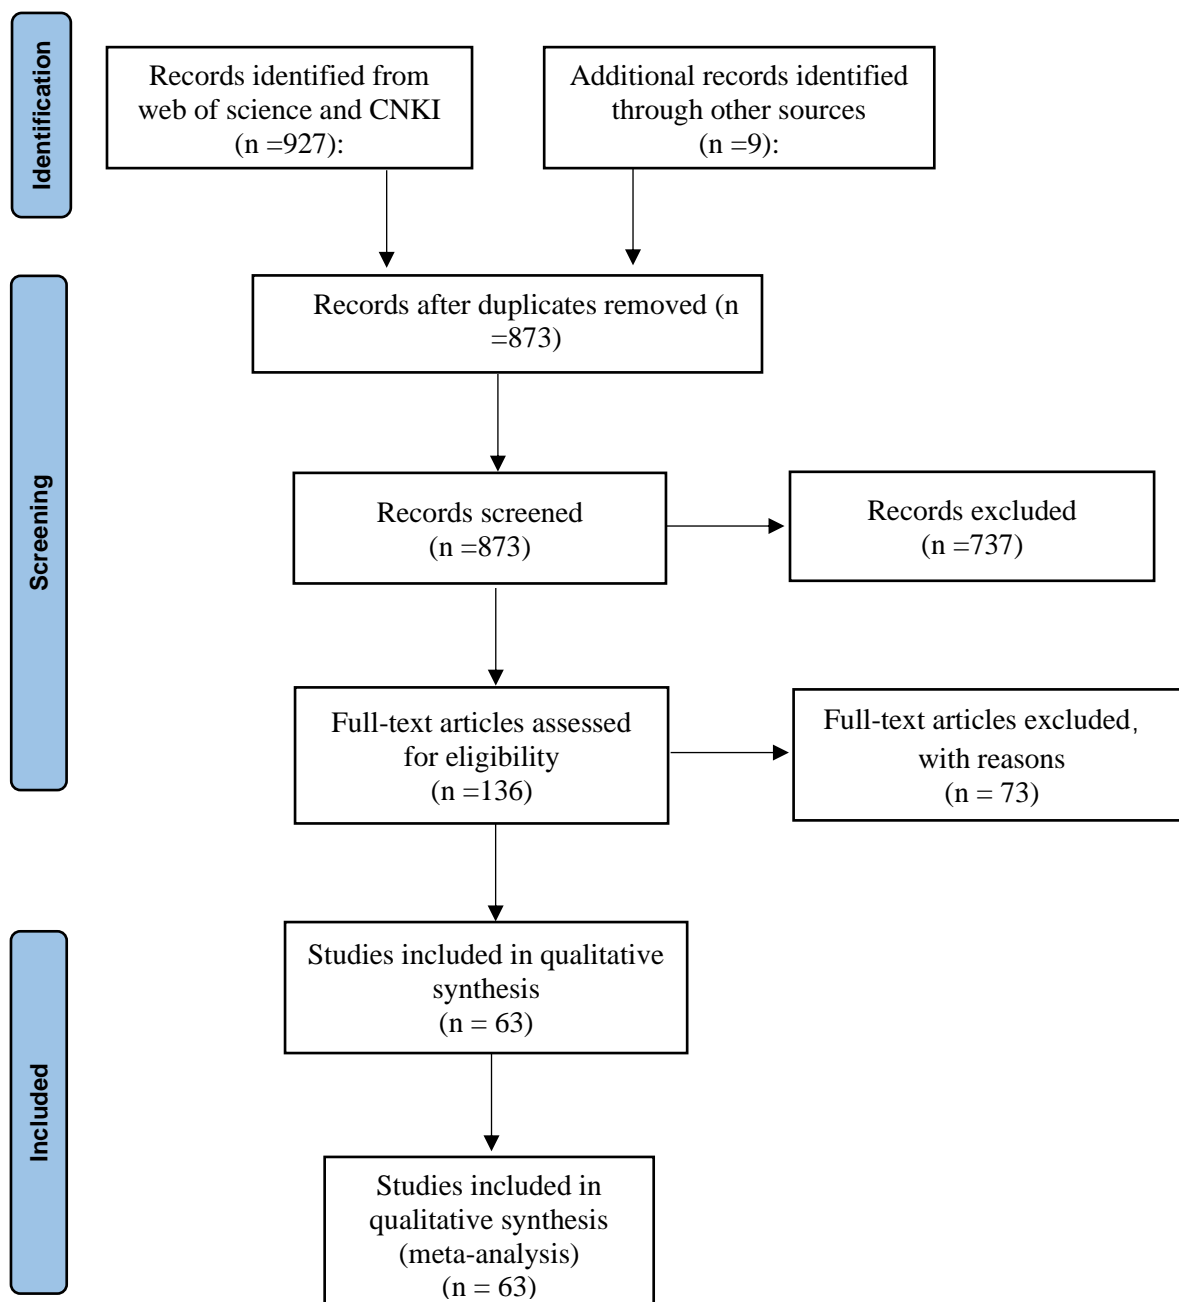

**Supplementary Fig. S1** Selection process for the meta-analysis.

Supplement: FigS1.pdf [file FigS1.pdf]
